# Supplementary material for: Improved host material for electrophosphorescence by positional engineering of spirobifluorene–carbazole hybrids
Source: Royal Society of Chemistry journal article supplement (doi:10.1039/c4tc01619j), 2014-08-27
Supplement: c4tc01619j1.pdf [file c4tc01619j1.pdf]

Electronic Supplementary Information

## To Achieve Better Host Material via Position Engineering at Spirobifluorene/Bicarbazole Hybrid for Electrophosphorescence

Yuan Liu, Lin-Song Cui, Xiao-Bo Shi, Qian Li, Zuo-Quan Jiang,\* Liang-Sheng Liao\*

*Jiangsu Key Laboratory for Carbon-Based Functional Materials & Devices, Institute  
of Functional Nano & Soft Materials (FUNSOM);*

*Collaborative Innovation Center of Suzhou Nano Science and Technology,  
Soochow University, Suzhou, Jiangsu 215123, China.*

*Email: zqjiang@suda.edu.cn; lsliao@suda.edu.cn.*

*Fax: +86-65882846. Tel: +86-512-65880945*

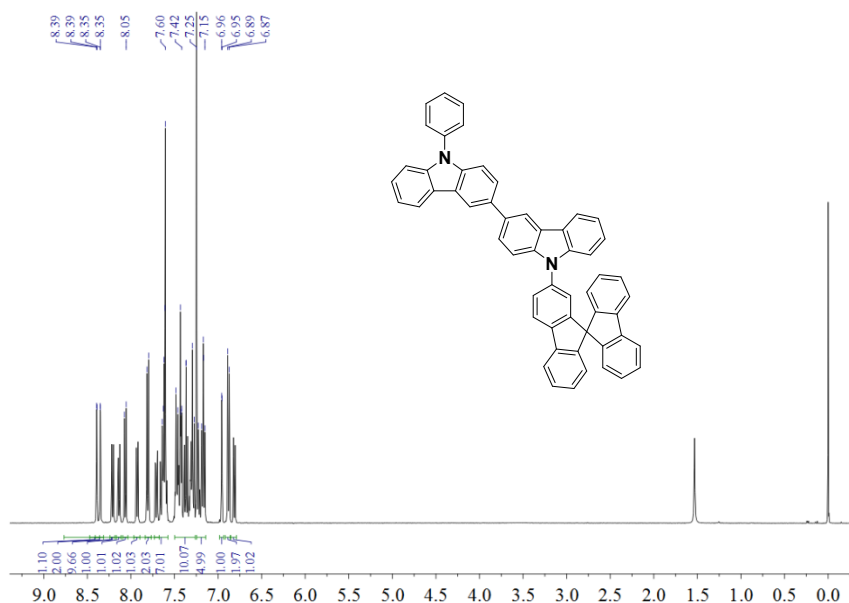

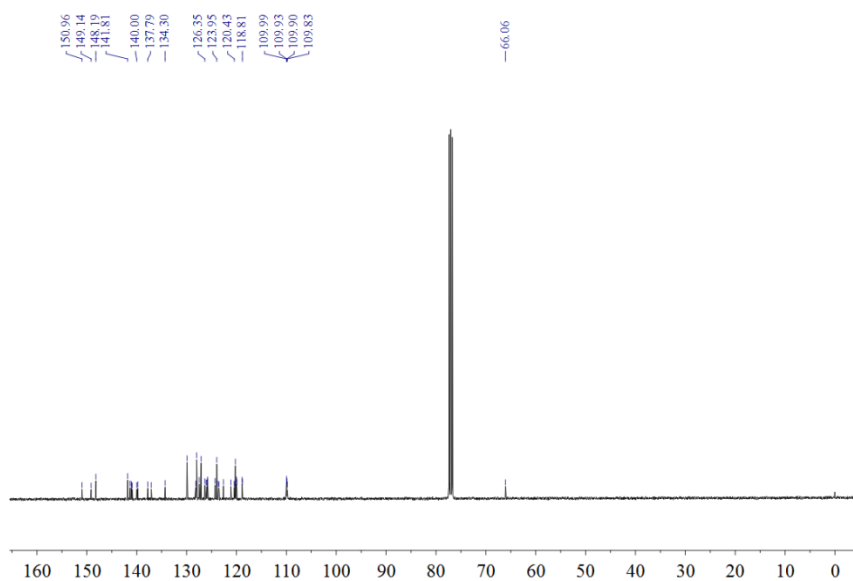

**Fig. S1.** <sup>1</sup>H NMR and <sup>13</sup>C NMR spectra of SF2BCz.

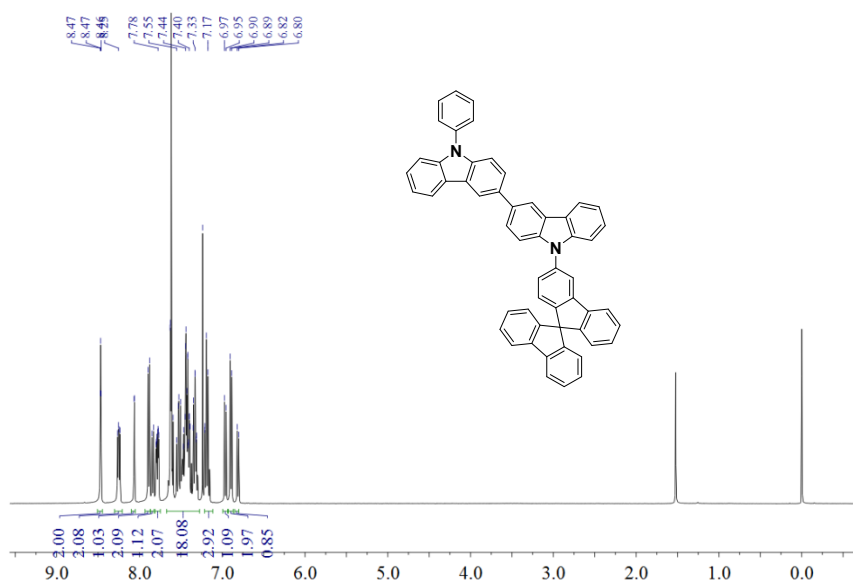

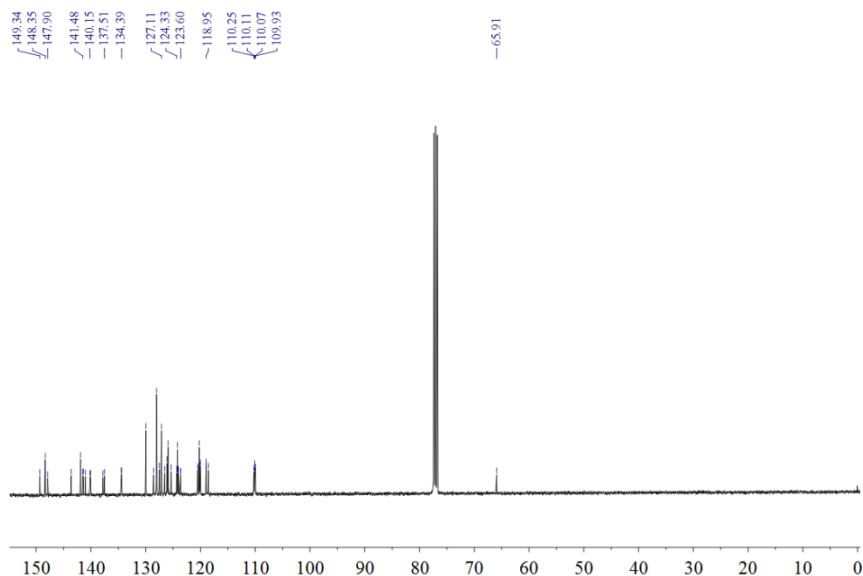

**Fig. S2.**  $^1\text{H}$  NMR and  $^{13}\text{C}$  NMR spectra of SF3BCz.

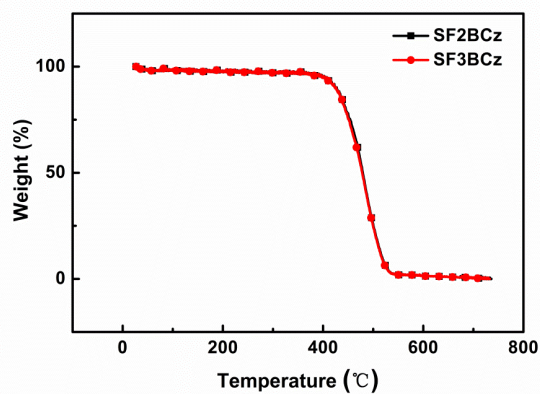

**Fig. S3.** The TGA of SF2BCz and SF3BCz.

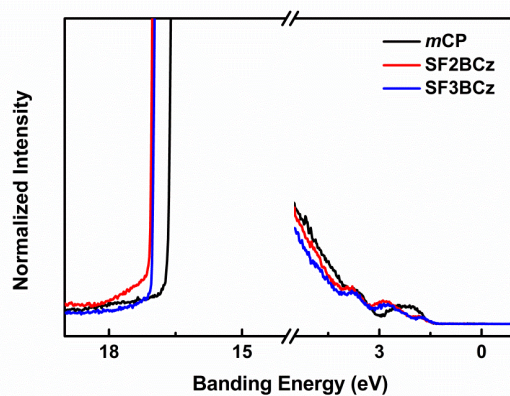

**Fig. S4.** The UPS spectrum of SF2BCz and SF3BCz thin film prepared by thermal evaporation.

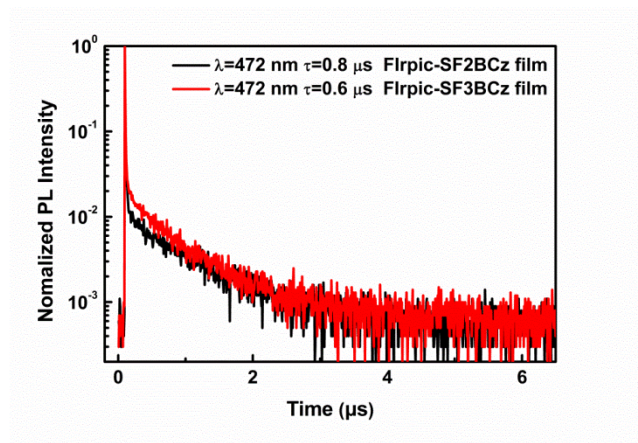

**Fig. S5.** Transient photoluminescence decay curves (excited at 370 nm) at room temperature at 472 nm for the Flrpic co-deposited with SF2BCz and SF3BCz.
